# Supplementary material for: Graphdiyne aerogel architecture via a modified Hiyama coupling reaction for gas adsorption
Source: Royal Society of Chemistry journal article supplement (doi:10.1039/d2cc05213j), 2023-01-01
Supplement: d2cc05213j1.pdf [file d2cc05213j1.pdf]

## **Electronic Supplementary Information**

### **Graphdiyne aerogel architecture via a modified Hiyama coupling reaction for gas adsorption**

*Qing Liu, Jiaqiang Li and Nikos Hadjichristidis\**

Physical Sciences and Engineering Division, King Abdullah University of Science and  
Technology (KAUST), Thuwal 23955, Saudi Arabia

E-mail: nikolaos.hadjichristidis@kaust.edu.sa

Keywords: graphdiyne, aerogel, modified Hiyama coupling, gas adsorption

# 1 Experimental Section

## 1.1 Materials

Most chemicals, such as  $\text{Cu}(\text{OAc})_2$ ,  $\text{CuCl}$ , pyridine, and N, N-dimethylformamide (DMF), were purchased from Aldrich Chemical Co. and used without further purification unless otherwise noted. Hexakis-[(trimethylsilyl)]ethynylbenzene (HEB-TMS) was purchased from Jiangsu XFNANO Material Tech Co., Ltd. (Nanjing, China).

## 1.2 Methods

**Preparation of GDY organogel:** GDY organogel was prepared from HEB-TMS using a modified Hiyama coupling method. First,  $\text{Cu}(\text{OAc})_2$  (18 mg, 0.1 mmol) was dissolved in pyridine (2 mL) in a glass vial under air and ultrasound for 3 min. Then, HEB-TMS (66 mg, 0.1 mmol) was added to the blue solution and ultrasound for another 3 min. The vial was sealed and put in the oven at 40 °C for 3 days without disturbance.

**Solvent exchange:** Typically, the obtained organogel was solvent exchanged two times sequentially with a large amount of pyridine, chloroform, ethanol, and water (every solvent exchange process takes 12 h).

**Preparation of GDY aerogel:** To prepare the GDY aerogel, a freeze dryer with a collector temperature of -90 °C and a vacuum of 0.015 mbar was used after the washed gel was flash-frozen by liquid nitrogen. A monolithic aerogel was obtained by freeze-drying for 3 days.

## 1.3 Characterization

**NMR spectra** were recorded on a Bruker AVANCE III-400 MHz NMR spectrometer (400 MHz for  $^1\text{H}$ , 100 MHz for  $^{13}\text{C}$ ) with deuterated chloroform ( $\text{CDCl}_3$ ) as solvent at room temperature.  $^1\text{H}$  NMR chemical shifts were reported in ppm using tetramethylsilane (TMS,  $\delta=0.00$  ppm) as the internal standard.  $^{13}\text{C}$  NMR spectra were reported in ppm using solvent  $\text{CDCl}_3$  ( $\delta=77.2$  ppm) as an internal standard.

**Scanning Electron Microscopy (SEM)** images were collected on a Quattro

Environmental Scanning Electron Microscope operating at 5 kV. Samples were prepared by directly putting aerogels on the conductive tape.

**Transmission Electron Microscopy (TEM)** images were recorded using a FEI Tecnai F30 electron microscope operating at 300 kV. Samples were prepared for analysis by scattering in ethanol with ultrasonic power, dropping the dispersion on copper grids, and drying at room temperature.

**Raman spectra** were carried out on a Witec's alpha 300 apyron with an excitation laser wavelength of 532 nm.

**X-ray photoelectron spectroscopy (XPS)** was run on Kratos Axis Ultra DLD to evaluate the composition of materials.

**Fourier Transform Infrared (FT-IR) spectra** were performed on a Nicolet iS10 FTIR spectrometer with a Smart iTR Attenuated Total Reflectance (ATR) sampling accessory with a spectral range of 4000-600  $\text{cm}^{-1}$ .

**UV-visible spectra** were acquired with GENESYS 10S UV-Vis spectrometer with a wavelength range from 200 to 1000 nm.

**Gas Adsorption Measurement:**  $\text{H}_2$  and  $\text{N}_2$  adsorption experiments were performed with ASAP 2420 (Micromeritics).  $\text{CO}_2$  and  $\text{CH}_4$  adsorption experiments were performed with ASAP 2050 (Micromeritics). Before the measurements, GDY aerogel samples were degassed at 80 °C for at least 20 hours on the Smart VacPrep system (Micromeritics).

**Oil uptake measurement:** Typically, a piece of aerogel was dropped into organic solvent or oil for 1 min. Then the weight gain (%) of aerogel was calculated by  $W_g = 100 \cdot (w - w_0) / w_0$ . Where  $w_0$  and  $w$  represent the mass of aerogel before and after absorption, respectively.

## 2 Supplementary Figures

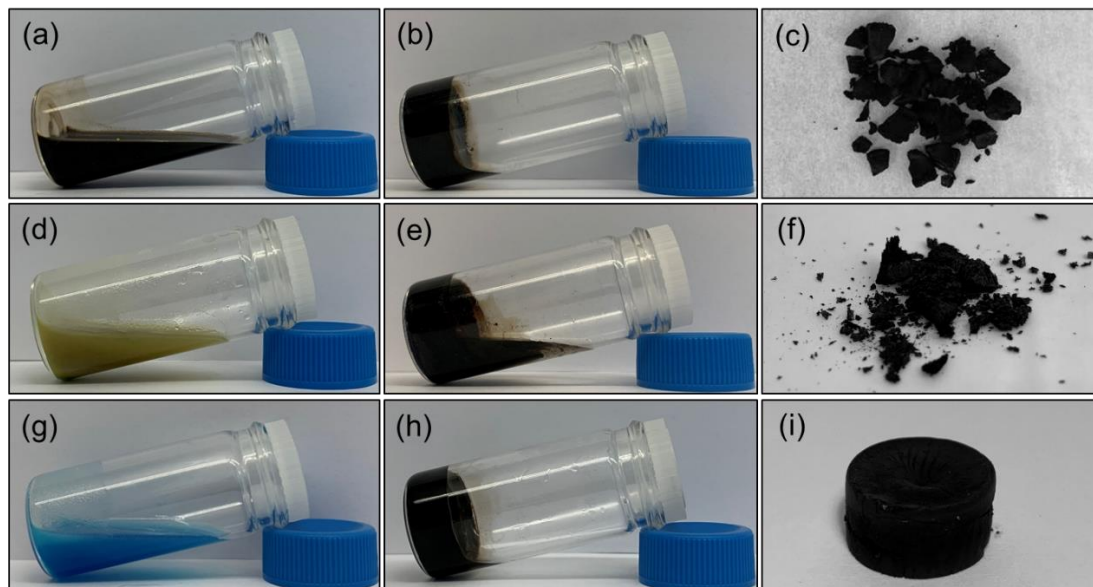

**Figure S1.** (a-b) The Eglinton coupling reaction used HEB as the monomer,  $\text{Cu}(\text{OAc})_2$  as the catalyst and pyridine as the solvent at 40 °C for 3 days. (c) The corresponding product of b after freeze-drying. (d-e) The Hiyama coupling reaction used HEB-TMS as the monomer,  $\text{CuCl}$  as the catalyst, and DMF as the solvent at 60 °C for 3 days. (f) The corresponding product of e after freeze-drying. (g-h) The modified Hiyama coupling reaction used HEB-TMS as the monomer,  $\text{Cu}(\text{OAc})_2$  as the catalyst, and pyridine as the solvent at 40 °C for 3 days. (i) The corresponding product of h after freeze-drying.

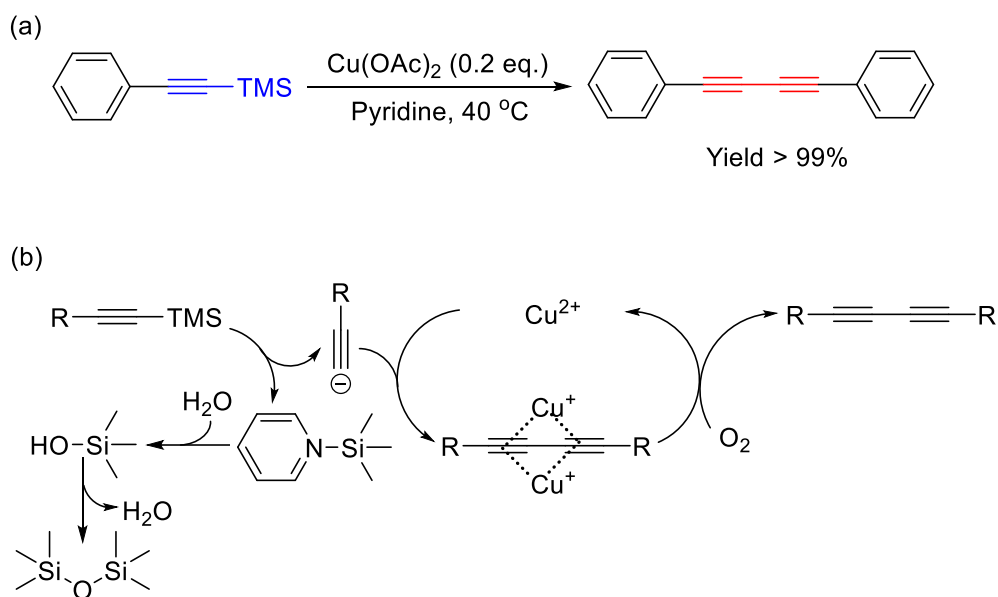

**Figure S2.** (a) A modified Hiyama coupling reaction was performed as the model reaction. (b) The proposed possible catalytic mechanism of the modified Hiyama coupling reaction.

Under pyridine/ $\text{Cu}(\text{OAc})_2$  system, the TMS group is eliminated (deprotection) and forms an alkynyl anion species. A reduction process then proceeds in the presence of the alkynyl anions species and  $\text{Cu}^{2+}$  to form binuclear-copper (I)-acetylide-intermediates.<sup>1</sup> Subsequently, these intermediates were dimerized oxidatively into a butadiyne product. The produced  $\text{Cu}^+$  is further oxidized into  $\text{Cu}^{2+}$  in the presence of air for the next catalytic cycle. The byproduct, TMS- group, is captured by pyridine to generate trimethylsilyl pyridine and then converted into TMS-OH and eventually to TMS-O-TMS.<sup>2</sup>

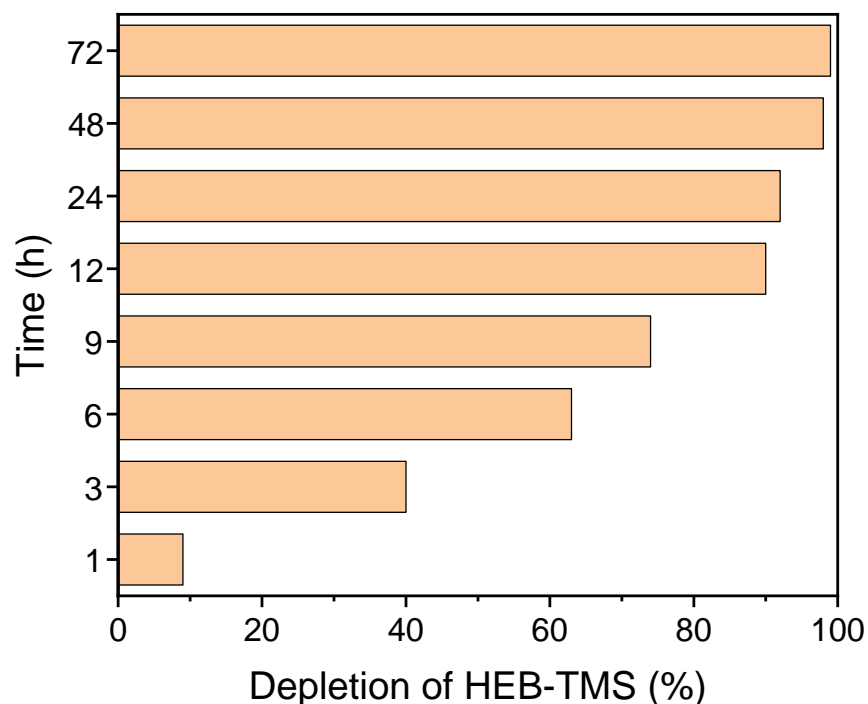

**Figure S3.** The depletion of monomer along with the reaction time. The depletion of monomer (%) was calculated by  $D = 1 - M$ , where  $M$  represents the residual amount of monomer (%) after the reaction. The residual amount of monomer was calculated by  $^1\text{H}$  NMR spectra with mesitylene as the internal standard.

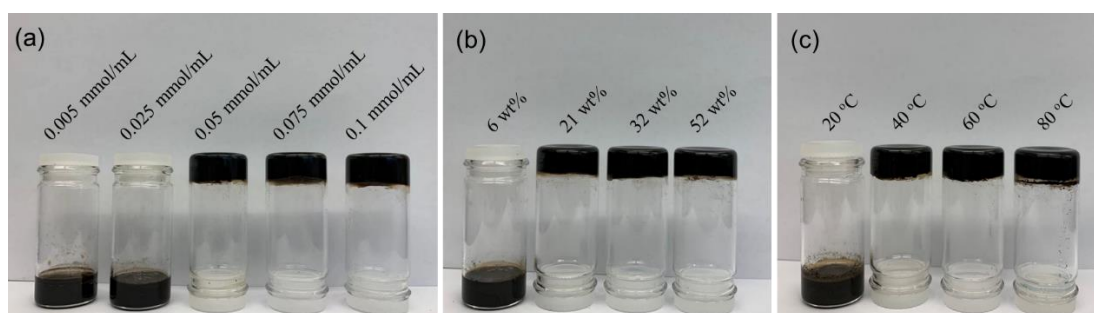

**Figure S4.** Photographs of GDY organogel prepared by varying (a) initial monomer concentrations, (b) catalyst amounts, and (c) reaction temperatures.

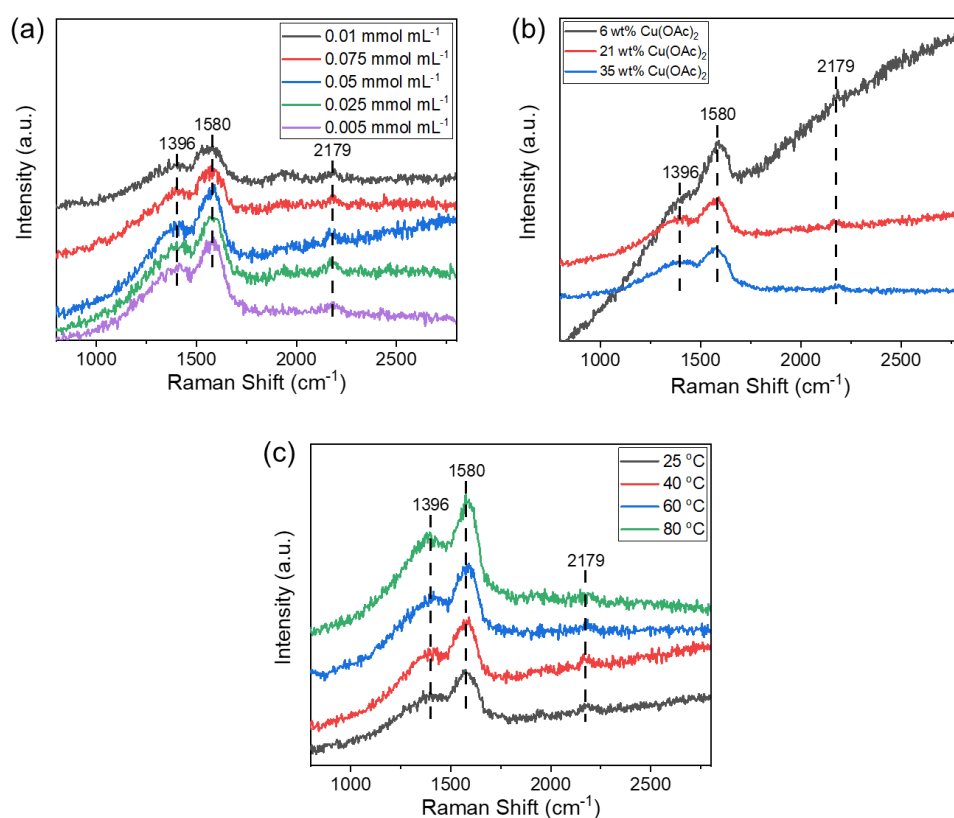

**Figure S5.** The Raman spectra of GDY aerogels collected with (a) different monomer concentrations, (b) different catalyst amounts, and (c) different reaction temperatures.

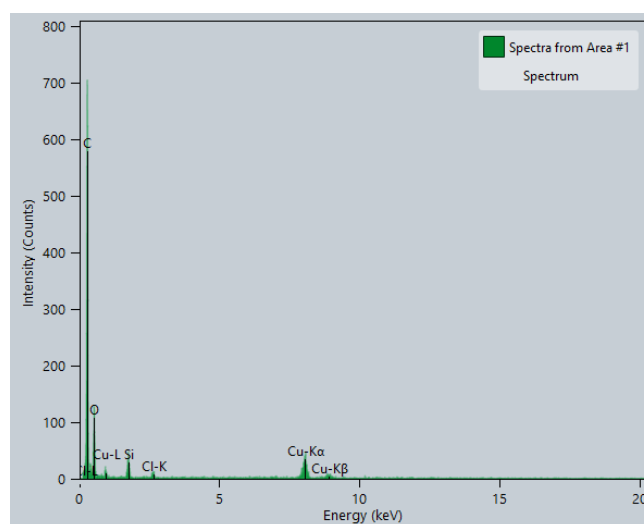

**Figure S6.** EDS spectra of GDY aerogels on Cu grid.

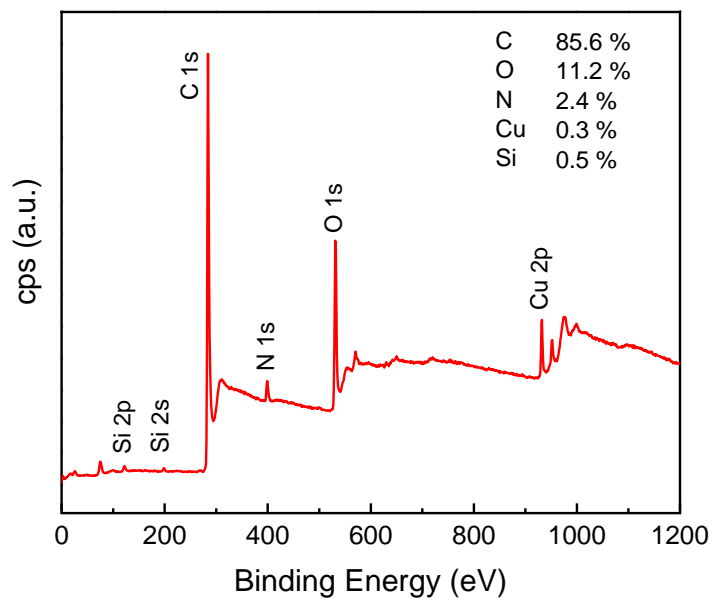

**Figure S7.** XPS survey spectrum of GDY aerogel.

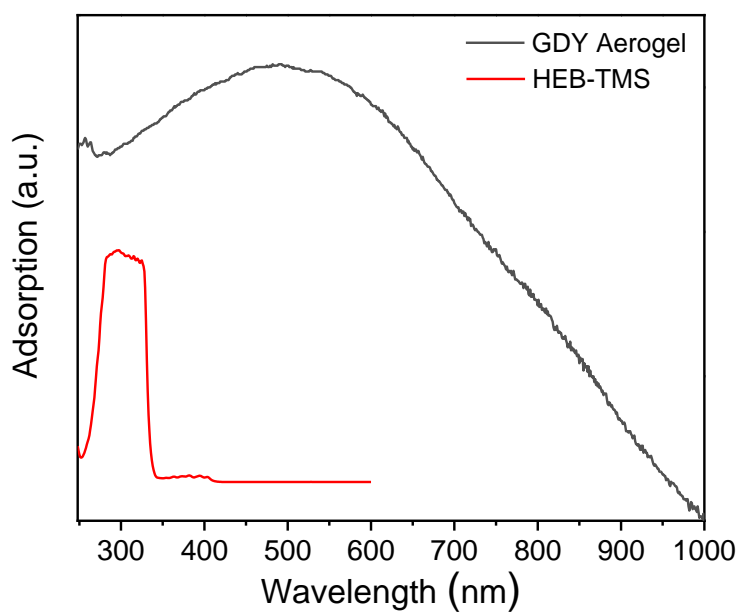

**Figure S8.** UV-vis spectra of HEB-TMS monomer and as-grown GDY aerogel.



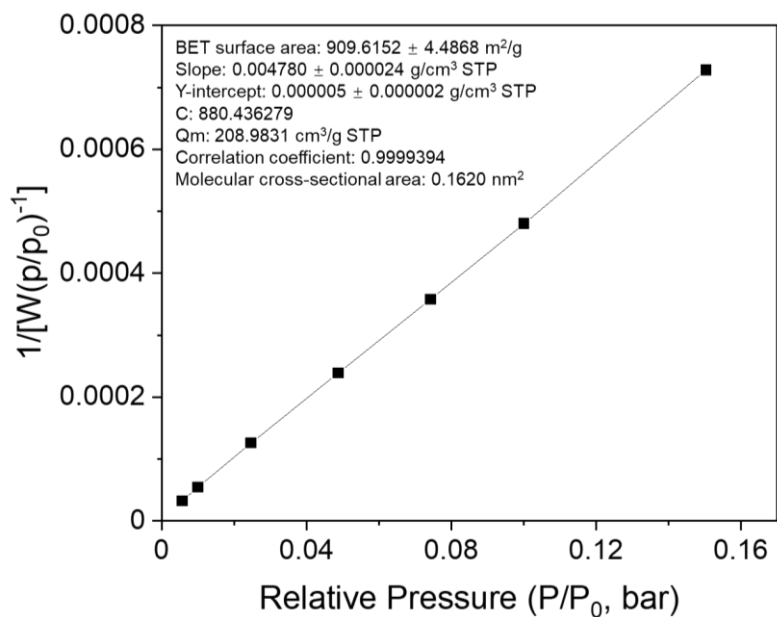

**Figure S9.** BET plot of GDY aerogel calculated from N<sub>2</sub> adsorption isotherm at 77K.

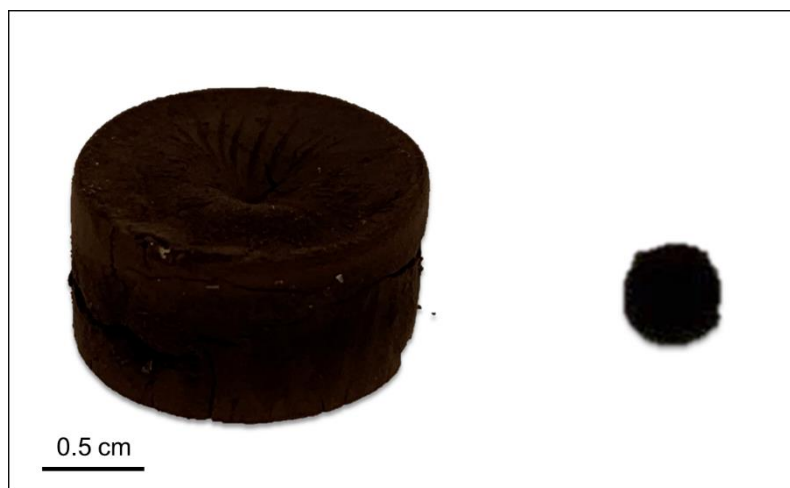

**Figure S10.** Photographs of GDY aerogel monolith (left) and GDY xerogel monolith (right). The GDY xerogel was obtained by open-atmosphere drying. The volume of GDY aerogel is  $2.035 \text{ cm}^3$  (1.8 cm of diameter and 0.8 cm of height), while the volume of GDY xerogel is  $0.039 \text{ cm}^3$  (0.5 cm of diameter and 0.2 cm of height).

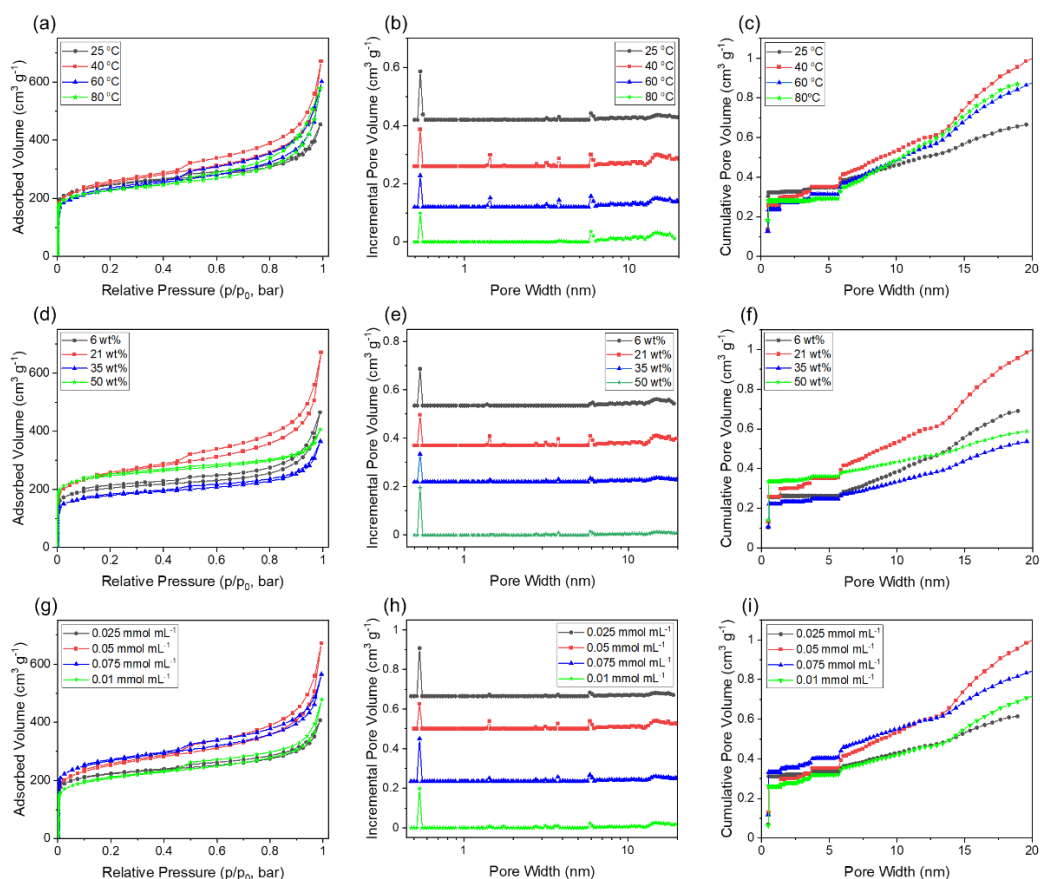

**Figure S11.** The  $N_2$  adsorption-desorption isotherms, incremental pore size distribution curves, and cumulative pore size distribution curves of GDY aerogels collected from different reaction temperatures (a-c), catalyst amounts (d-f) and monomer concentrations (g-i).

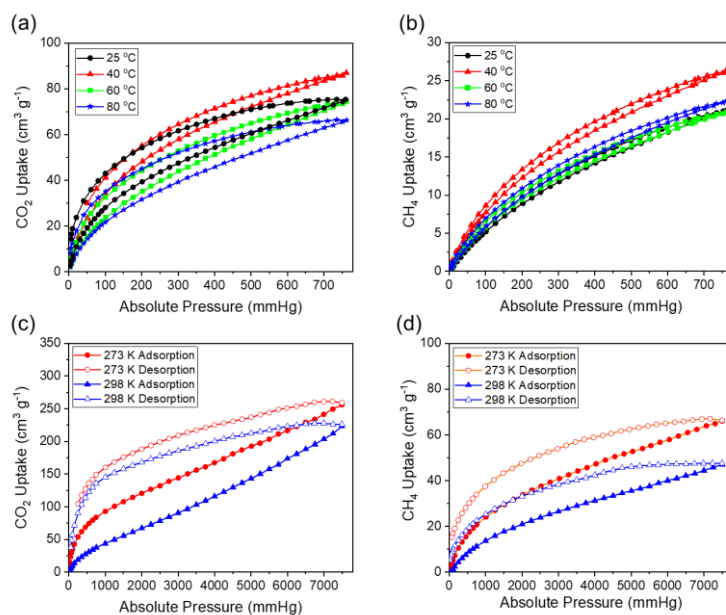

**Figure S12.** (a-b) The CO<sub>2</sub> and CH<sub>4</sub> adsorption-desorption isothermals of GDY aerogels obtained at different reaction temperatures. (c-d) Extended pressure adsorption-desorption isotherms of CO<sub>2</sub> and CH<sub>4</sub> on GDY aerogels at different test temperatures.

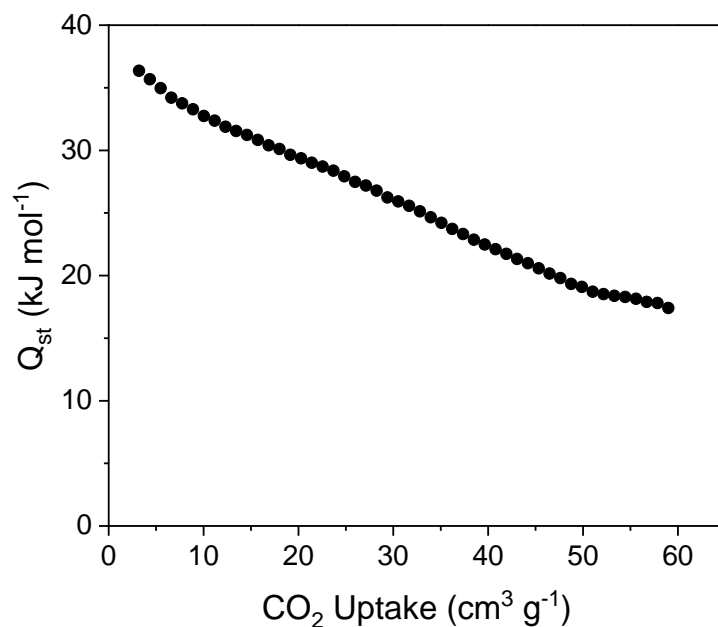

**Figure S13.** Isosteric heats of adsorption ( $Q_{st}$ ) for CO<sub>2</sub>, calculated using the Clausius-Clapeyron equation.

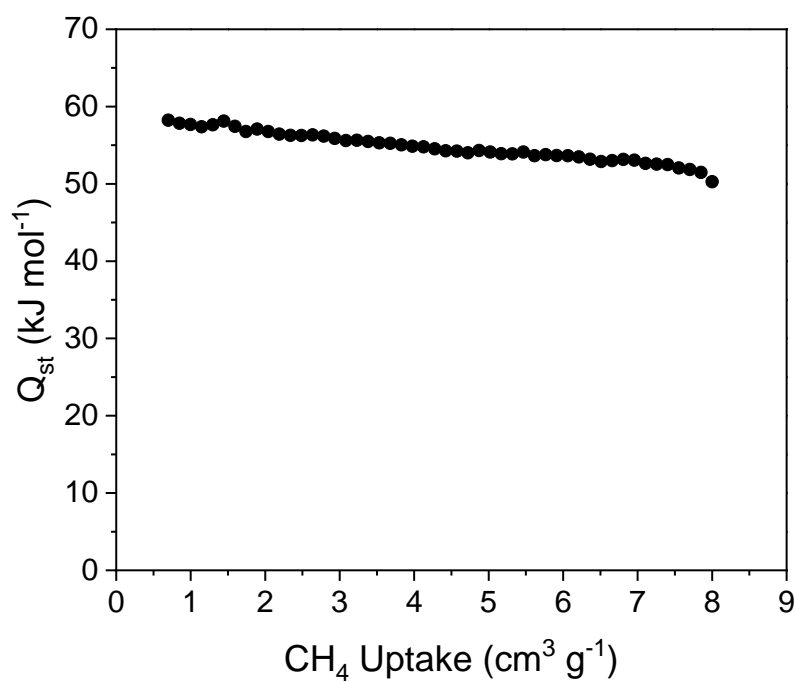

**Figure S14.** Isosteric heats of adsorption ( $Q_{st}$ ) for  $\text{CH}_4$ , calculated using the Clausius-Clapeyron equation.

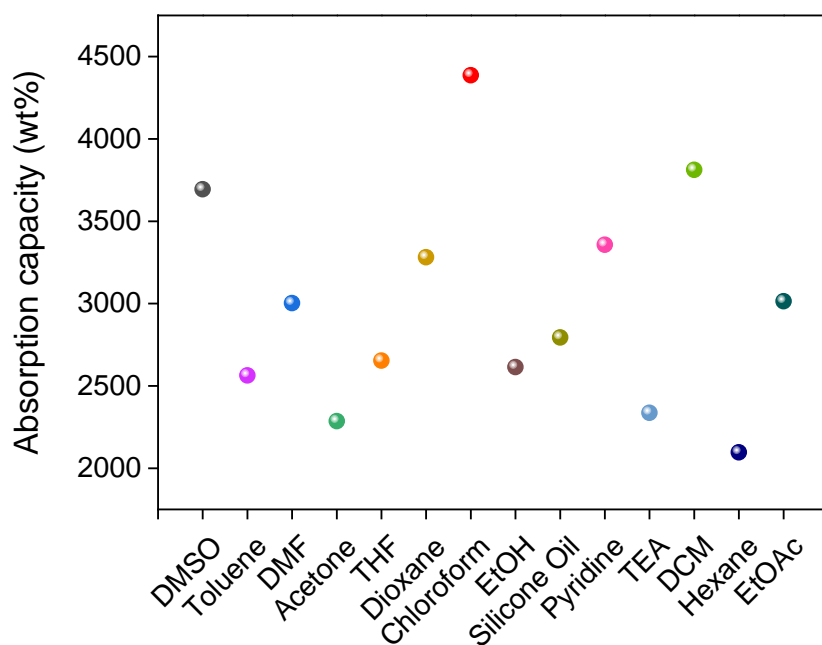

**Figure S15.** Mass-based adsorption capacity of the GDY aerogel.

**Table S1.** Summary of BET surface area of GDY materials and GDY analogues.

| <b>Materials</b>        | <b>BET surface area (m<sup>2</sup> g<sup>-1</sup>)</b> | <b>Reference</b> |
|-------------------------|--------------------------------------------------------|------------------|
| GDY aerogel             | 1155                                                   | This work        |
| GDY/G                   | 390                                                    | [3]              |
| The pristine GDY powder | 120                                                    | [3]              |
| Nanochain               | 1150                                                   | [4]              |
| Nanoribbon              | 186                                                    | [4]              |
| 3D Framework            | 766                                                    | [4]              |
| HGDY                    | 207                                                    | [5]              |
| MeGDY                   | 559                                                    | [5]              |
| CNGDY                   | 636                                                    | [5]              |
| BGDY                    | 725                                                    | [6]              |
| PR-GDY                  | 408                                                    | [7]              |
| NSFLGDY-900             | 431                                                    | [8]              |
| HsGDY                   | 667                                                    | [9]              |
| HsGDY                   | 2184                                                   | [10]             |
| 3D GDY powder           | 369                                                    | [11]             |
| P-GDY                   | 918                                                    | [12]             |
| HK@GDY/CMC-B            | 945                                                    | [13]             |
| TGDY                    | 758                                                    | [14]             |
| TA-BGY                  | 300                                                    | [15]             |
| F-GDY                   | 422                                                    | [16]             |
| HsGY                    | 1453                                                   | [17]             |

**Table S2.** Oil/organic solvent uptake capacity and density of various carbon-based adsorbents.

| Materials                          | Density (mg cm <sup>-3</sup> ) | Absorbate                                                                                                                                                             | Capacity (g g <sup>-1</sup> ) | Reference |
|------------------------------------|--------------------------------|-----------------------------------------------------------------------------------------------------------------------------------------------------------------------|-------------------------------|-----------|
| GDY aerogel                        | 12                             | DMSO, Toluene, DMF, Acetone, THF, Dioxane, Chloroform, Ethanol, Triethylamine, Pyridine, DCM, Hexane, Ethyl acetate, Silicon oil.                                     | 22-44                         | This work |
| Activated carbon                   | -                              | Benzene, Toluene.                                                                                                                                                     | <1                            | [18]      |
| Graphene aerogel                   | 12~18                          | DMF, Ethanol, Toluene, Hexane, Cyclohexane, Chlorobenzene, Phenixin, Pump oil, Vegetable oil, Paraffin oil, Kerosene.                                                 | 15-60                         | [19]      |
| PVA/CNTs aerogels                  | 27~82                          | DMF, Chloroform, THF, Acetonitrile, Acetone, Hexane, Toluene, Bean oil.                                                                                               | 10-52                         | [20]      |
| Lignin/Agarose/PVA carbon aerogels | 52                             | THF, Toluene, Oleic acid, DCM, Chloroform, Hexane, Vacuum pump oil, Liquid paraffin.                                                                                  | 20-40                         | [21]      |
| Polydopamine/chitosan/rGO aerogel  | 80                             | Ethanol, Gasoline, Acetone, Diesel, Hexane, Toluene.                                                                                                                  | 10-21                         | [22]      |
| PTEB aerogel                       | 30                             | Triethylamine, n-Butylamine, Cyclohexane, Ethanol, Acetone, Toluene, Pyridine, DMSO, Nitrobenzene, Chloroform, Bromobenzene, Phenoxin, Pump oil, Bean oil, Motor oil. | 13-53                         | [23]      |
| HCMPs                              | -                              | Kerosene, Ethyl acetate, DCM, Nitrobenzene, Toluene, Benzene, Bromobenzene, Aniline, Xylene, Trimethylbenzene,                                                        | 1-16                          | [24]      |

**Table S3.** Summary of CO<sub>2</sub> and CH<sub>4</sub> adsorption data of various materials.

| Materials                       | BET surface area (m <sup>2</sup> g <sup>-1</sup> ) | CO <sub>2</sub> uptake (mmol g <sup>-1</sup> ) | CH <sub>4</sub> uptake (mmol g <sup>-1</sup> ) | Reference |
|---------------------------------|----------------------------------------------------|------------------------------------------------|------------------------------------------------|-----------|
| HCPs                            |                                                    |                                                |                                                |           |
| BINOL network 4                 | 1015                                               | 3.96                                           | -                                              | [25]      |
| 1,3,5-tripheylbenzene-based HCP | 1059                                               | 3.61                                           | -                                              | [26]      |
| HCP-1                           | 1646                                               | 3.01                                           | -                                              | [27]      |
| HCP-2                           | 1684                                               | 3.3                                            | -                                              | [27]      |
| HCP-3                           | 1531                                               | 3.24                                           | -                                              | [27]      |
| HCP-4                           | 1642                                               | 3.92                                           | -                                              | [27]      |
| COFs                            |                                                    |                                                |                                                |           |
| COF-1                           | 750                                                | 2.32                                           | -                                              | [28]      |
| COF-5                           | 1670                                               | 1.34                                           | -                                              | [28]      |
| COF-6                           | 750                                                | 3.84                                           | -                                              | [28]      |
| COF-8                           | 1350                                               | 1.43                                           | -                                              | [28]      |
| COF-10                          | 1760                                               | 1.21                                           | 0.35                                           | [28]      |
| COF-102                         | 3620                                               | 1.56                                           | 0.63                                           | [28]      |
| COF-103                         | 3530                                               | 1.7                                            | -                                              | [28]      |
| CMPs                            |                                                    |                                                |                                                |           |
| CMP-0                           | 1018                                               | 2.1                                            | -                                              | [29]      |
| CMP-1                           | 837                                                | 2.05                                           | -                                              | [29]      |
| CMP-3                           | 522                                                | 2.18                                           | -                                              | [29]      |
| CMP-5                           | 512                                                | 1.11                                           | -                                              | [29]      |
| TCMP-0                          | 963                                                | 2.38                                           | -                                              | [29]      |
| TCMP-3                          | 691                                                | 2.25                                           | -                                              | [29]      |
| TCMP-5                          | 494                                                | 1.22                                           | -                                              | [29]      |
| TNCMP-2                         | 995                                                | 2.62                                           | -                                              | [29]      |
| NCMP-2                          | 900                                                | 2.1                                            | -                                              | [29]      |
| PTEB aerogel                    | 1701                                               | 3.47                                           | 0.913                                          | [23]      |
| Tet-1                           | 3160                                               | 2.55                                           | -                                              | [30]      |
| Tet-2                           | 1102                                               | 1.96                                           | -                                              | [30]      |

|         |      |      |      |      |
|---------|------|------|------|------|
| Tet-3   | 3180 | 2.66 | -    | [30] |
| Tet-4   | 1917 | 3.03 | -    | [30] |
| CTFs    |      |      |      |      |
| CTF-0   | 2011 | 4.22 | -    | [31] |
| CTF-1   | 746  | 2.47 | -    | [32] |
| FCTF-1  | 662  | 4.67 | -    | [32] |
| CTF-P6  | 1152 | 3.36 | -    | [33] |
| CTF-P6M | 947  | 4.17 | -    | [33] |
| PCTF-1  | 2235 | 3.25 | 1.05 | [34] |
| PCTF-2  | 784  | 1.85 | 0.67 | [34] |
| PCTF-3  | 641  | 2.17 | 0.76 | [34] |
| PCTF-4  | 1090 | 2.31 | 0.9  | [34] |
| PCTF-5  | 1183 | 2.59 | 0.91 | [34] |
| PCTF-7  | 613  | 2.18 | 0.65 | [34] |
| PAFs    |      |      |      |      |
| PAF-1   | 5600 | 2.05 | 0.8  | [35] |
| PAF-3   | 2932 | 3.48 | 1.21 | [36] |
| PAF-4   | 2246 | 2.4  | 0.8  | [36] |
| Cages   |      |      |      |      |
| Cage 1  | 23   | 1.27 | 0.55 | [37] |
| Cage 2  | 533  | 3    | 1.13 | [37] |
| Cage 3  | 624  | 2.47 | 1.53 | [37] |
| Cage 5  | 1333 | 3.07 | -    | [38] |



## References

- [1] Y. Kong, J. Li, S. Zeng, C. Yin, L. Tong and J. Zhang, *Chem*, 2020, **6**, 1933.
- [2] J. Li, X. Han, D. Wang, L. Zhu, T. Pino, J. Arbiol, L. Wu and M. N. Ghazzal, *Angew. Chem. Int. Ed.*, 2022, **61**, e202210242.
- [3] J. Li, L. Zhong, L. Tong, Y. Yu, Q. Liu, S. Zhang, C. Yin, L. Qiao, S. Li, R. Si and J. Zhang, *Adv. Funct. Mater.*, 2019, **29**, 1905423.
- [4] Z. Zuo, H. Shang, Y. Chen, J. Li, H. Liu, Y. Li and Y. Li, *Chem. Commun.*, 2017, **53**, 8074.
- [5] W. Zhou, H. Shen, Y. Zeng, Y. Yi, Z. Zuo, Y. Li and Y. Li, *Angew. Chem. Int. Ed.*, 2020, **59**, 4908.
- [6] H. Shang, Z. Zuo, L. Li, F. Wang, H. Liu, Y. Li and Y. Li, *Angew. Chem. Int. Ed.*, 2018, **57**, 774.
- [7] R. Sakamoto, R. Shiotsuki, K. Wada, N. Fukui, H. Maeda, J. Komeda, R. Sekine, K. Harano and H. Nishihara, *J. Mater. Chem. A.*, 2018, **6**, 22189.
- [8] Y. Zhao, N. Yang, H. Yao, D. Liu, L. Song, J. Zhu, S. Li, L. Gu, K. Lin and D. Wang, *J. Am. Chem. Soc.*, 2019, **141**, 7240.
- [9] J. He, N. Wang, Z. Cui, H. Du, L. Fu, C. Huang, Z. Yang, X. Shen, Y. Yi, Z. Tu and Y. Li, *Nat. Commun.*, 2017, **8**, 1172.
- [10] S. Kong, D. Cai, G. Li, X. Xu, S. Zhou, X. Ding, Y. Zhang, S. Yang, X. Zhou, H. Nie, S. Huang, P. Peng and Z. Yang, *Nanoscale*, 2021, **13**, 3817.
- [11] J. Li, J. Xu, Z. Xie, X. Gao, J. Zhou, Y. Xiong, C. Chen, J. Zhang and Z. Liu, *Adv. Mater.*, 2018, **30**, 1800548.
- [12] X. Shen, X. Li, F. Zhao, N. Wang, C. Xie, J. He, W. Si, Y. Yi, Z. Yang, X. Li, F. Lu and C. Huang, *2D Mater.*, 2019, **6**, 035020.
- [13] H. Zhang, Y. Muhammad, X. Cui, Z. Zhang, L. Liu, Z. Chu, J. Li, Y. Zhang, S. J. Shah and Z. Zhao, *J. Mater. Chem. A.*, 2021, **9**, 4066.
- [14] Y. Yue, Y. Xu, F. Kong, Q. Li and S. Ren, *Carbon*, 2020, **167**, 202.
- [15] T. Chen, W. Q. Li, X. J. Chen, Y. Z. Guo, W. B. Hu, W. J. Hu, Y. A. Liu, H. Yang and K. Wen, *Chem. Eur. J.*, 2020, **26**, 2269.

- [16] J. He, N. Wang, Z. Yang, X. Shen, K. Wang, C. Huang, Y. Yi, Z. Tu and Y. Li, *Energy Environ Sci.*, 2018, **11**, 2893.
- [17] Y. Li, L. Sun and T. Zhu, *J. Mol. Liq.*, 2019, **296**, 111958.
- [18] M. A. Lillo-Ródenas, D. Cazorla-Amorós and A. Linares-Solano, *Carbon*, 2005, **43**, 1758.
- [19] J. Wang, Z. Shi, J. Fan, Y. Ge, J. Yin and G. Hu, *J. Mater. Chem.*, 2012, **22**, 22459.
- [20] C. B. Ma, B. Du and E. Wang, *Adv. Funct. Mater.*, 2017, **27**, 1604423.
- [21] J. Jiang, Q. Zhang, X. Zhan and F. Chen, *ACS Sustainable Chem. Eng.*, 2017, **5**, 10307.
- [22] N. Cao, Q. Lyu, J. Li, Y. Wang, B. Yang, S. Szunerits and R. Boukherroub, *Chem. Eng. J.*, 2017, **326**, 17.
- [23] R. Du, N. Zhang, H. Xu, N. Mao, W. Duan, J. Wang, Q. Zhao, Z. Liu and J. Zhang, *Adv. Mater.*, 2014, **26**, 8053.
- [24] D. Tan, W. Fan, W. Xiong, H. Sun, A. Li, W. Deng and C. Meng, *Eur. Polym. J.*, 2012, **48**, 705.
- [25] R. Dawson, L. A. Stevens, T. C. Drage, C. E. Snape, M. W. Smith, D. J. Adams and A. I. Cooper, *J. Am. Chem. Soc.*, 2012, **134**, 10741.
- [26] B. Li, R. Gong, W. Wang, X. Huang, W. Zhang, H. Li, C. Hu and B. Tan, *Macromolecules*, 2011, **44**, 2410.
- [27] C. F. Martín, E. Stöckel, R. Clowes, D. J. Adams, A. I. Cooper, J. J. Pis, F. Rubiera and C. Pevida, *J. Mater. Chem.*, 2011, **21**, 5475.
- [28] H. Furukawa and O. M. Yaghi, *J. Am. Chem. Soc.*, 2009, **131**, 8875.
- [29] S. Ren, R. Dawson, A. Laybourn, J. Jiang, Y. Khimiyak, D. J. Adams and A. I. Cooper, *Polym. Chem.*, 2012, **3**, 928.
- [30] J. R. Holst, E. Stöckel, D. J. Adams and A. I. Cooper, *Macromolecules*, 2010, **43**, 853.
- [31] P. Katekomol, J. Roeser, M. Bojdys, J. Weber and A. Thoma, *Chem. Mater.*, 2013, **25**, 1542.
- [32] Y. Zhao, K. X. Yao, B. Teng, T. Zhang and Y. Han, *Energy Environ. Sci.*, 2013, **6**, 3684.
- [33] S. Ren, M. J. Bojdys, R. Dawson, A. Laybourn, Y. Z. Khimiyak, D. J. Adams and A. I. Cooper, *Adv. Mater.*, 2012, **24**, 2357.
- [34] A. Bhunia, I. Boldog, A. Möller and C. Janiak, *J. Mater. Chem. A*, 2013, **1**, 14990.
- [35] T. Ben, H. Ren, S. Ma, D. Cao, J. Lan, X. Jing, W. Wang, J. Xu, F. Deng, J. M. Simmons, S. Qiu and G. Zhu, *Angew. Chem. Int. Ed.*, 2009, **48**, 9457.

- [36] T. Ben, C. Pei, D. Zhang, J. Xu, F. Deng, X. Jing and S. Qiu, *Energy Environ. Sci.*, 2011, **4**, 3991.
- [37] T. Tozawa, J. T. Jones, S. I. Swamy, S. Jiang, D. J. Adams, S. Shakespeare, R. Clowes, D. Bradshaw, T. Hasell, S. Y. Chong, C. Tang, S. Thompson, J. Parker, A. Trewin, J. Bacsá, A. M. Slawin, A. Steiner and A. I. Cooper, *Nat. Mater.*, 2009, **8**, 973.
- [38] J. T. Jones, T. Hasell, X. Wu, J. Bacsá, K. E. Jelfs, M. Schmidtman, S. Y. Chong, D. J. Adams, A. Trewin, F. Schiffman, F. Cora, B. Slater, A. Steiner, G. M. Day and A. I. Cooper, *Nature*, 2011, **474**, 367.
